# Supplementary material for: Prognostic value of serum lactate kinetics in critically ill patients with cirrhosis and acute-on-chronic liver failure: a multicenter study
Source: publisher site journal article supplement (doi:10.18632/aging.102062), 2019-07-01
Supplement: Supplementary file [file aging-v11i13-102062-supplementary-material-SD1.pdf]

## SUPPLEMENTARY FIGURE

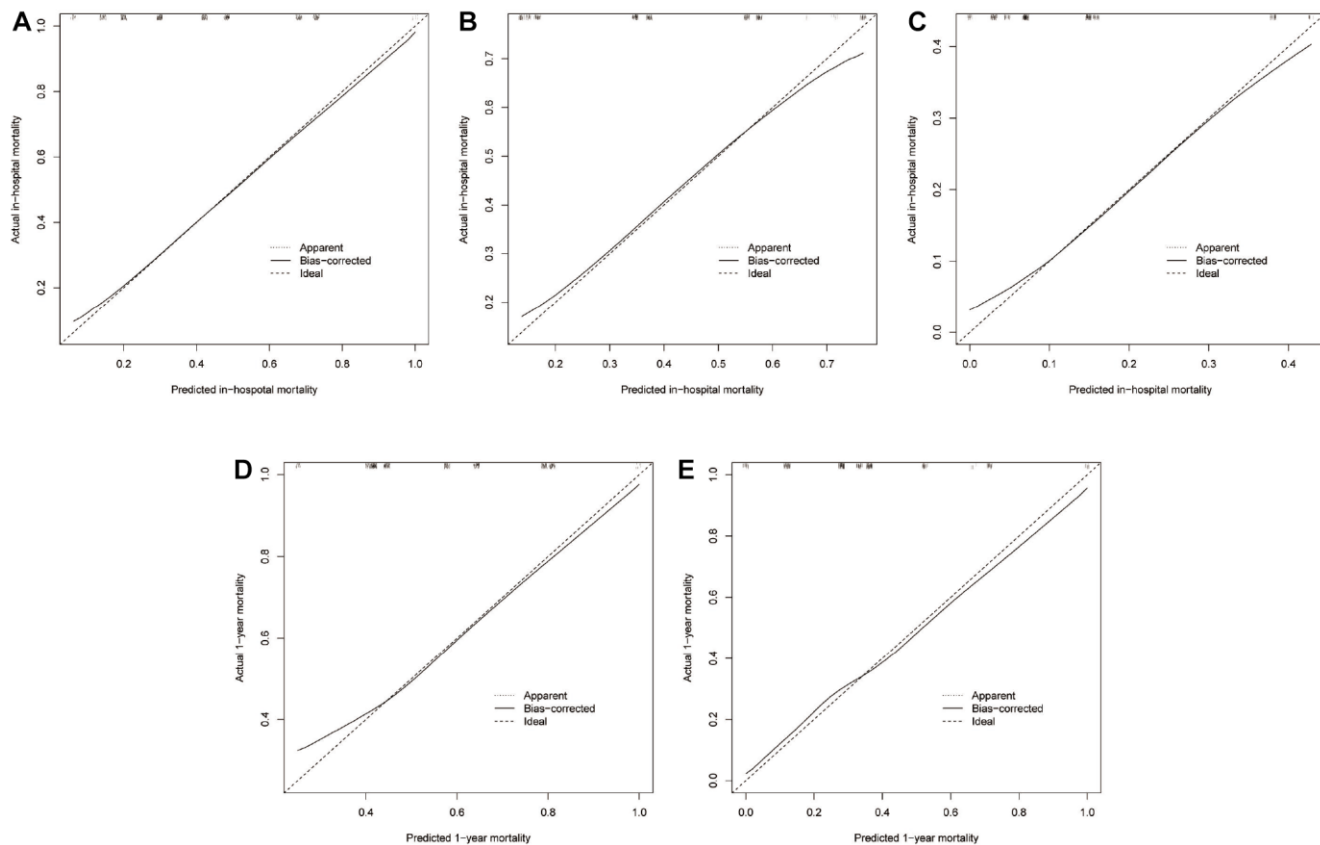

**Supplementary Figure 1. Calibration curves of LiFe- $\Delta$ 24Lac.** The y-axis represents the actual mortality rate. The x-axis represents the predicted mortality rate. The shallow line represents a perfect prediction by an ideal model. Predicting in-hospital mortality in patients with cirrhosis: MIMIC cohort (A); eICU cohort (B); WMU cohort (C). Predicting 1-year mortality in patients with cirrhosis: MIMIC cohort (D); WMU cohort (E).
